# Supplementary material for: Electrochemical synthesis of phosphorus-doped graphene quantum dots for free radical scavenging
Source: Royal Society of Chemistry journal article supplement (doi:10.1039/c6cp06377b), 2017-01-01
Supplement: c6cp06377b1.pdf [file c6cp06377b1.pdf]

Electronic Supplementary Material (ESI) for Physical Chemistry Chemical Physics.

This journal is © the Owner Societies 2016

## Supporting Information for

### Electrochemical Synthesis of Phosphorus-Doped Graphene

### Quantum Dots for Free Radicals Scavenging

Yan Li<sup>\*a</sup>, Sen Li<sup>a</sup>, Yingmin Wang<sup>a</sup>, Jun Wang<sup>a</sup>, Hui Liu<sup>a</sup>, Xinqian Liu<sup>a</sup>, Lifeng Wang<sup>a</sup>, Xiaoguang

Liu<sup>a</sup>, Wendong Xue<sup>a</sup>, Ning Ma<sup>\*b</sup>

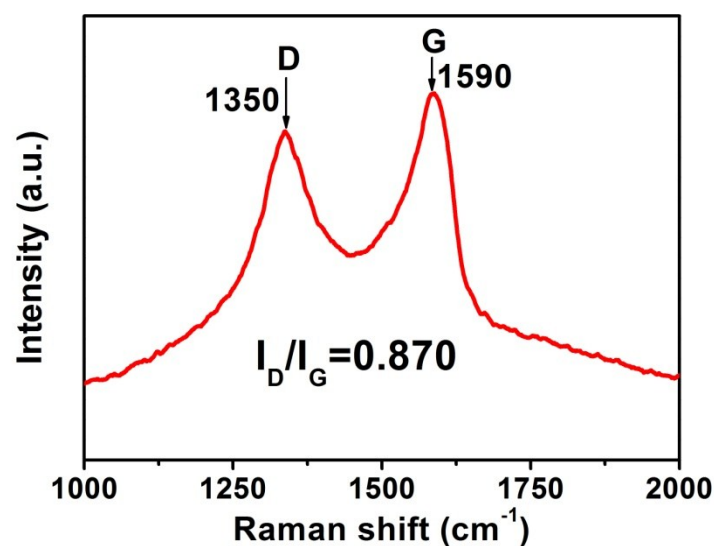

Figure. S1. The Raman spectrum of GQDs, typical D and G bands are observed near 1350 and 1590 cm<sup>-1</sup>, respectively, which are corresponding to the D and G band of graphene structure. The intensity ratio  $I_D/I_G$  is 0.870.

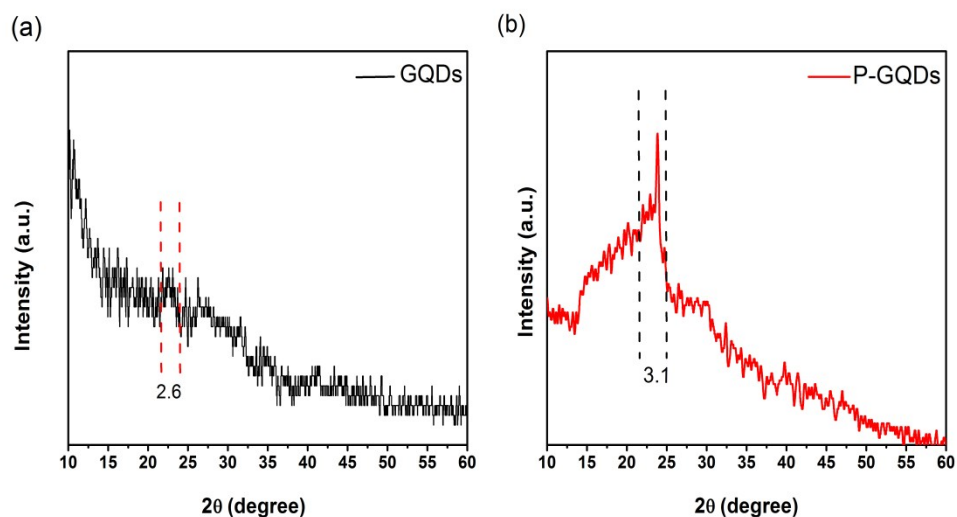

Figure. S2 The XRD spectra of the GQDs and P-GQDs, the broad diffraction peak at around  $24^\circ$ , which was corresponded to (002) peak of graphite<sup>22</sup>, could be seen in GQD and P-GQD. However, the full width at half maximum of the peak for P-GQDs ( $3.1^\circ$ ) is wider than that of P-GQD ( $2.6^\circ$ ), indicating more defects were introduced to P-GQDs.

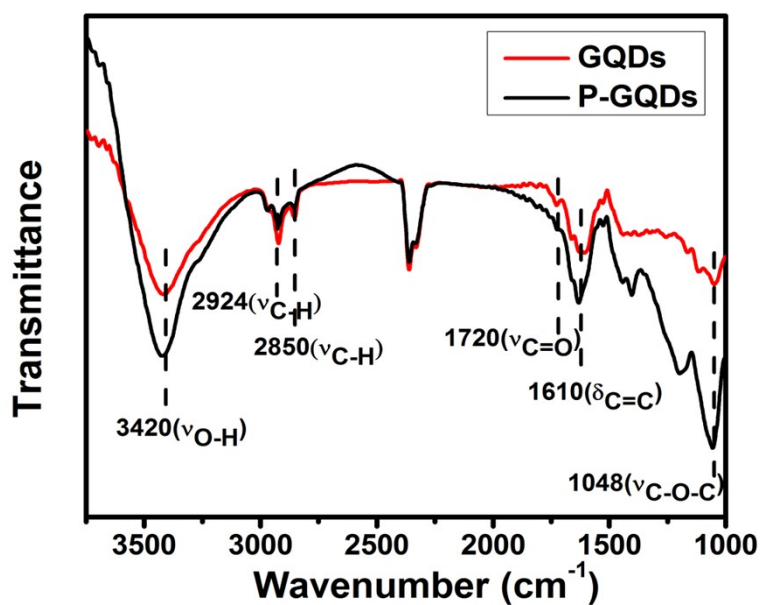

Figure. S3. The FT-IR spectra of GQDs (red) and P-GQDs (black) made from PBS and sodium phytate electrolyte, respectively. The distinct peaks at  $1048\text{cm}^{-1}$ ,  $1610\text{cm}^{-1}$

<sup>1</sup>, 1720cm<sup>-1</sup>, 2850cm<sup>-1</sup>, 2924cm<sup>-1</sup> and 3420 cm<sup>-1</sup> are attributed to C-O-C, C=C, C=O, symmetrical peak of CH<sub>2</sub>, anti-symmetric peak of the CH<sub>2</sub> and O-H, respectively. The content of the C-O-C in the GQDs is far less than that in P-GQDs.

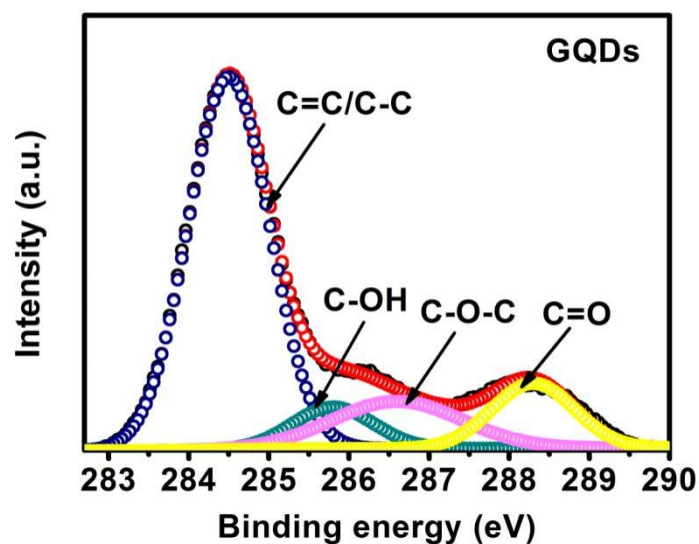

Figure. S4. High resolution XPS spectrum of the C1s of the GQDs made from PBS electrolytes. The C1s XPS spectrum (Fig.2C) could be de-convoluted into four peaks at 284.5eV (C=C/C-C), 285.9eV (C-OH), 286.7eV (C-O-C) and 288.3eV (C=O), among which the content of C-O-C is less than that in P-GQDs.

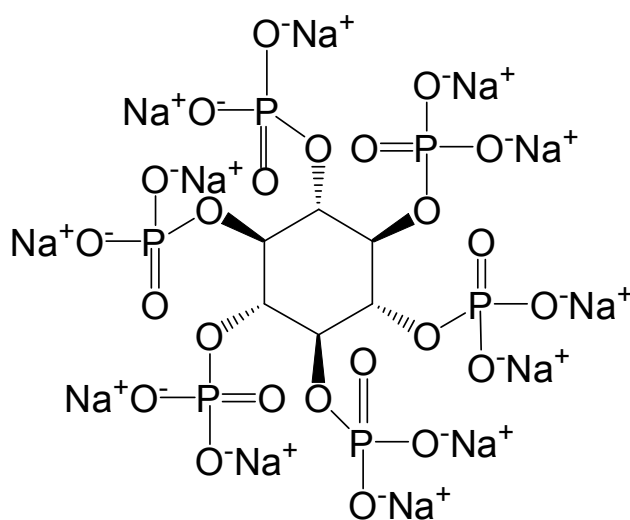

Figure. S5. Molecular structure of sodium phytate

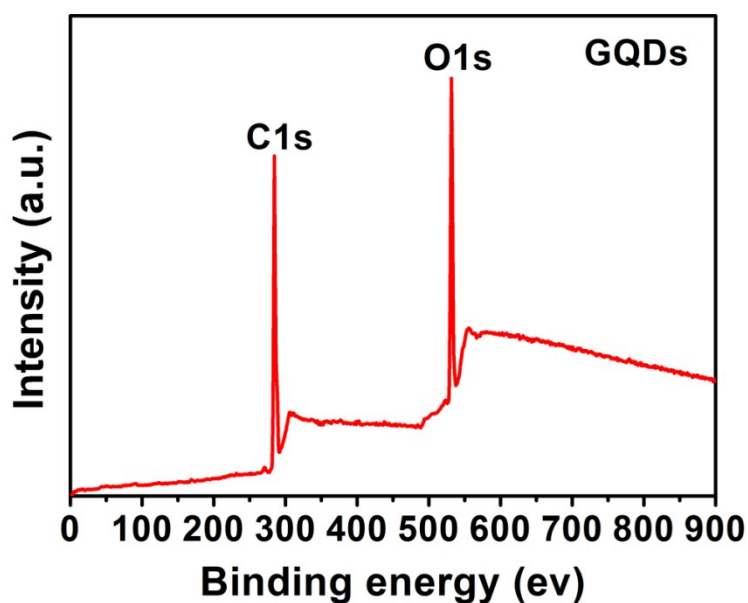

Figure. S6. The survey XPS spectrum of GQDs made from PBS electrolyte shows strong peaks of C1s at 284.5eV and O1s at 532.1eV, but does not exhibit peaks relevant to phosphors. This confirms that no phosphors were doped in the GQDs.

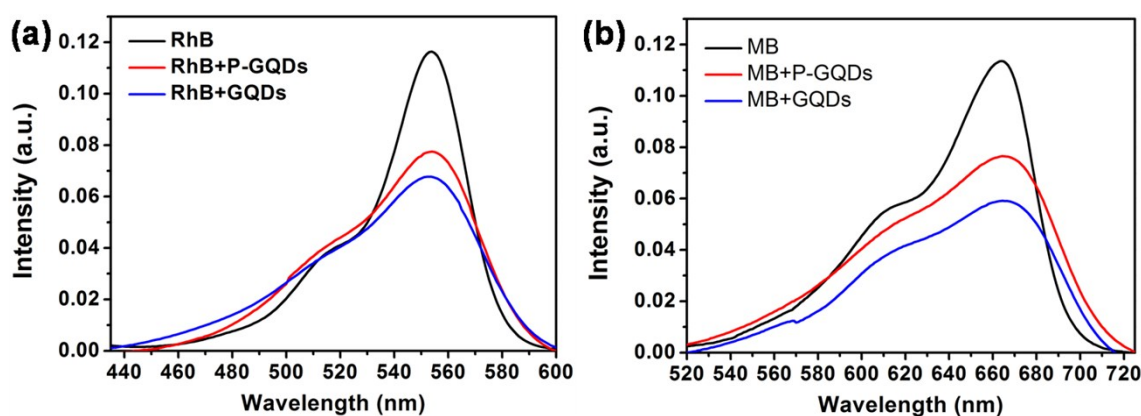

Figure. S7. The adsorption behavior of P-GQDs and GQDs was measured by RhB and MB, both two kinds of GQDs have the performance to absorb the organic matters, and the adsorption behaviour of GQDs is better than the P-

GQDs. According to the research of graphene, the adsorption behaviour of both GQDs are resulting from the electrostatic interaction and  $\pi$ - $\pi$  stacking interaction,<sup>39</sup> the GQDs have a higher content of  $sp^2$  structure, thus corresponded to a better performance of adsorption.

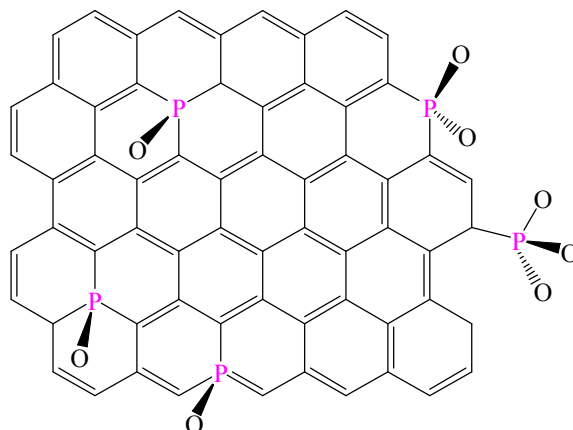

Figure. S8. The  $C_3PO$ ,  $C_2PO_2$  and  $CPO_3$  structure of P-GQDs.

Table.S1 Comparison of Different kind of DPPH scavenger's highest scavenging efficiency.

| DPPH Scavenger    | DPPH's concentration ( $\mu\text{mol/L}$ ) | The highest scavenging efficiency (%) | Ref       |
|-------------------|--------------------------------------------|---------------------------------------|-----------|
| Fenugreek seeds   | 100                                        | 54                                    | 1         |
| Fueoxanthin       | 100                                        | 40                                    | 2         |
| Thioglycolic acid | 50                                         | 80                                    | 3         |
| Pinus maritima    | 60                                         | 94                                    | 4         |
| CNTs              | 100                                        | 95.5                                  | 5         |
| P-GQDs            | 63                                         | 79.7                                  | This work |

**Table.S2** Comparison of the content of each element in GQDs and P-GQDs

before and after reaction with DPPH.

| Element Content (at%) | C     | O     | N    | P    |
|-----------------------|-------|-------|------|------|
| GQDs before           | 70.53 | 29.47 | /    | /    |
| GQDs after            | 81.95 | 12.67 | 5.38 | /    |
| P-GQDs before         | 54.93 | 37.35 | /    | 7.73 |
| P-GQDs after          | 75.23 | 17.67 | 4.39 | 2.71 |

#### Notes and references

- 1 S. Kaviarasan, G. H. Naik, R. Gangabthagirathi, C. V. Anuradha and K. I. Priyadarsini, *Food chem*, 2007, **103**: 31-37.
- 2 Y. Nomura, M. Kikuchi, A. Kubodera and Y. Kawakami, *IUBMB Life*, 1997, **42**, 361-370.
- 3 N. D. Yordanov and A. G. Christova, *Fresen J Anal chem*, 1997, **358**: 610-613.
- 4 S. Dudonné, X. Vitrac, P. Coutiere, M. Woillez and J. M. Mérillon, *J Agr Food Chem*, 2009, **57**, 1768-1774.
- 5 Y.-T. Shieh and W.-W. Wang, *Carbon.*, 2014, **79**, 354-362.
